# Supplementary material for: Biogenic Phosphonate Utilization by Globally Distributed Diatom Thalassiosira pseudonana
Source: MDPI journal article supplement (doi:10.3390/microorganisms12040761), 2024-04-10
Supplement: s1 [file s1]

# Supplementary materials

## Biogenic Phosphonate Utilization by Globally Distributed Diatom *Thalassiosira pseudonana*

Huilin Shu <sup>1,2,4</sup>, Yuan Shen <sup>1,3</sup>, Hongwei Wang <sup>1,3</sup>, Xueqiong Sun <sup>1,3</sup>, Jian Ma <sup>1,2</sup> and Xin Lin <sup>1,3,\*</sup>

<sup>1</sup> State Key Laboratory of Marine Environmental Science, Xiamen University, Xiamen 361005, China; shuhuilin@jxnu.edu.cn (H.S.); yuanshen@xmu.edu.cn (Y.S.); wanghongwei@stu.xmu.edu.cn (H.W.); 22320220156409@stu.xmu.edu.cn (X.S.); jma@xmu.edu.cn (J.M.)

<sup>2</sup> College of the Environment and Ecology, Xiamen University, Xiamen 361005, China

<sup>3</sup> College of Ocean and Earth Sciences, Xiamen University, Xiamen 361005, China

<sup>4</sup> College of Life Sciences, Jiangxi Normal University, Nanchang 330022, China

\* Correspondence: xinlin@xmu.edu.cn

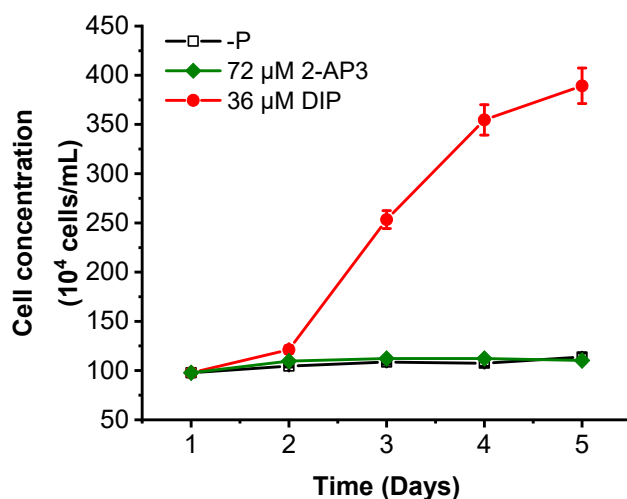

Figure S1. Growth curve of *P. tricornutum* under 2-AP3 treatment.

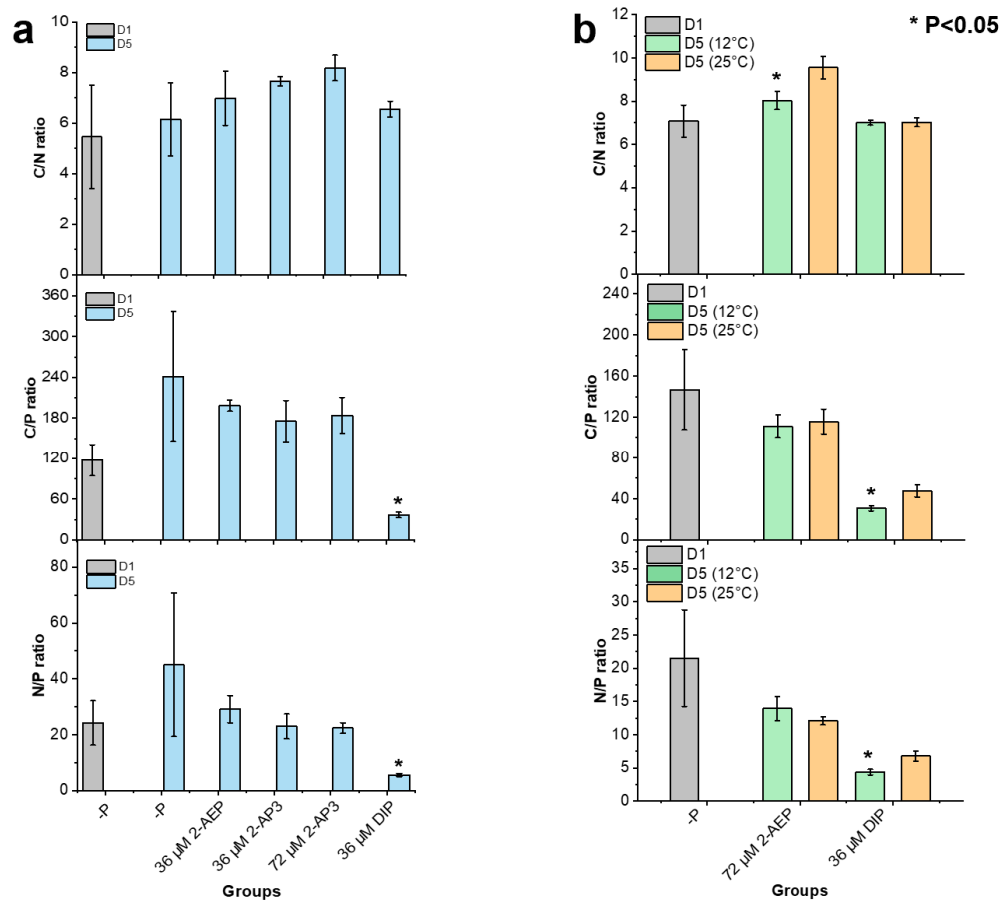

**Figure S2.** Stoichiometry of *T. pseudonana* under different phosphorus (a) and temperature (b) conditions. \* represent the significant difference between (a) P-depleted and other phosphorus treated group, and (b) between 12 °C and 25 °C.

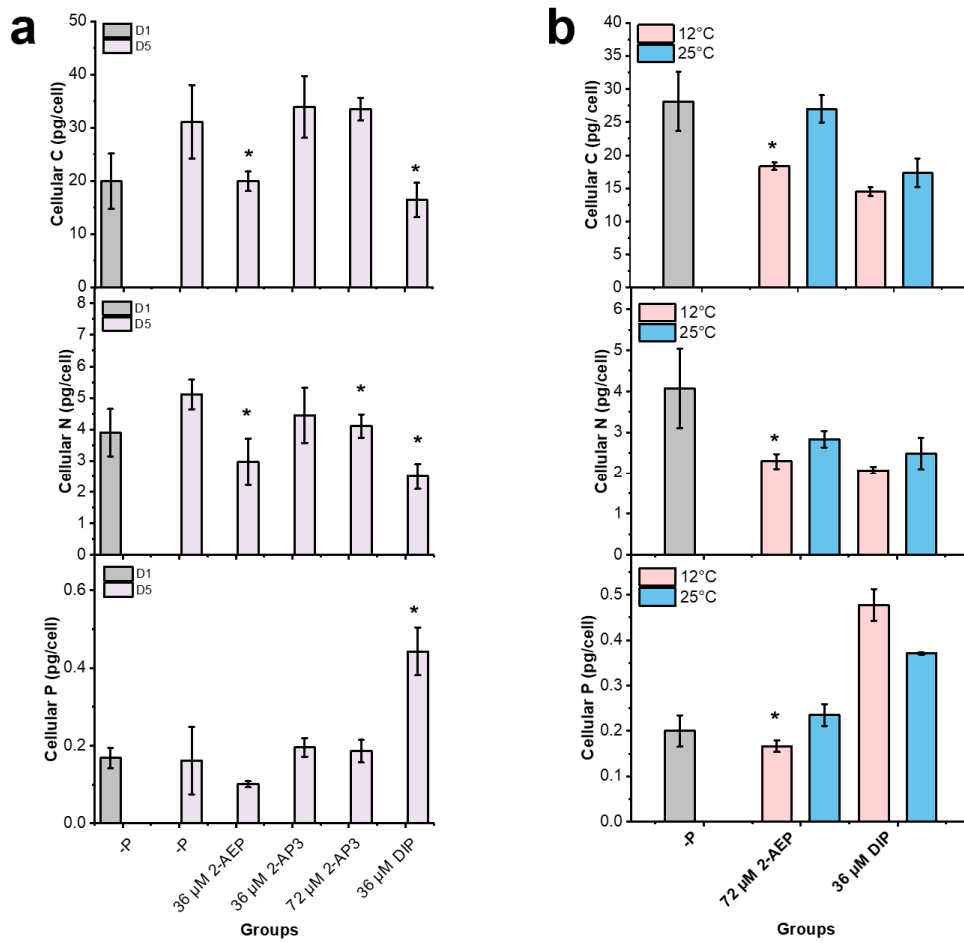

**Figure S3.** Variations of cellular C, N and P under different phosphorus (a) and temperature (b) conditions. \* represent the significant difference ( $p < 0.05$ ) between (a) P-depleted and other phosphorus treated group, and (b) between 12 °C and 25 °C.
